# Supplementary material for: Blood-based metabolic signatures in Alzheimer's disease
Source: PubMed Central journal article supplement — Alzheimers Dement (Amst). 2017 Sep 6;8:196–207. doi: 10.1016/j.dadm.2017.07.006 (PMC5607205; doi:10.1016/j.dadm.2017.07.006), 2017-09-06
Supplement: mmc3.pdf [file mmc3.pdf]

# BLOOD-BASED METABOLIC SIGNATURES IN ALZHEIMER'S DISEASE: SUPPLEMENTARY TEXT 3

## BASIC RESULTS ON ALL CASES

FRANCISCA A. DE LEEUW\*<sup>†</sup>, CAREL F.W. PEETERS\*<sup>†</sup>,  
MAARTJE I. KESTER, AMY C. HARMS, EDUARD A. STRUYS,  
THOMAS HANKEMEIER, HERMAN W.T. VAN VLIJMEN,  
SVEN J. VAN DER LEE, CORNELIA M. VAN DUIJN, PHILIP SCHELTENS,  
AYŞE DEMIRKAN, MARK A. VAN DE WIEL,  
WIESJE M. VAN DER FLIER, AND CHARLOTTE E. TEUNISSEN

This supplementary text presents, for purposes of comparison, basic information on the obtained expression and classification signatures when considering data from all patients. That is, patients whose clinical diagnosis was discordant from their CSF-biomarker status were not excluded from the analyzes described below. Processing of the data was analogous to the steps described in Section 2.4 of the main text and *Section 1.2 of Supplementary Text 2*. Again, metabolites with more than 10% missing observations were removed, leading to the removal of the same 5 metabolites mentioned in *Section 1.2 of Supplementary Text 2*. Also, again three data samples were removed as their (plasma) quality was deemed unsure and an additional twelve data samples were removed due to instrumental errors in one or more MS platforms. The final metabolic data set for the analyzes below thus contained  $n = 285$  data samples (141 AD and 144 SCD) and  $p = 230$  metabolic features. Section 1 contains information on the differential expression signature. Section 2 then contains information on the classification signature. Section 3 concludes with some reflections on the findings.

### 1. DIFFERENTIAL EXPRESSION SIGNATURE

The approach for the evaluation of differential metabolic expression between AD and SCD subjects was described in *Section 2.1.1 of Supplementary Text 2*. The list of metabolic features that survive multiple testing correction when only sex and age are used as possible confounders can be found in Table S3.1. Table S3.2 then contains the list of metabolic features that survive multiple testing correction when correcting for all clinical variables of interest (see Table 1 of the main text). All compounds in the latter table appear to be underexpressed in the AD group relative to the control group, except for the Sphingomyelin SM(d18:1/20:1).

---

\* Shared first authorship.

<sup>†</sup> Corresponding author.

TABLE S3.1. Differentially expressed metabolites when correcting for sex and age only.

| Metabolite                 | Compound class                           | <i>p</i> -value | Adjusted <i>p</i> -value |
|----------------------------|------------------------------------------|-----------------|--------------------------|
| 2-Aminoadipic acid         | Amines                                   | 6.085903e-08    | 1.399758e-05             |
| Methyldopa                 | Amines                                   | 2.583401e-07    | 2.970911e-05             |
| Valine                     | Amines                                   | 6.498148e-07    | 4.981913e-05             |
| Tyrosine                   | Amines                                   | 1.697832e-06    | 9.762531e-05             |
| Lysine                     | Amines                                   | 1.101781e-05    | 5.068193e-04             |
| S-3-Hydroxyisobutyric acid | Organic acids                            | 2.749051e-05    | 1.053803e-03             |
| TG(54:6)                   | Lipids: Triglycerides                    | 5.209223e-05    | 1.539997e-03             |
| TG(48:0)                   | Lipids: Triglycerides                    | 5.356511e-05    | 1.539997e-03             |
| 8-iso-PGF2a (15-F2t-IsoP)  | Oxidative stress: Isoprostane            | 7.698703e-05    | 1.967446e-03             |
| TG(50:4)                   | Lipids: Triglycerides                    | 8.835841e-05    | 2.032243e-03             |
| Methylmalonic acid         | Organic acids                            | 1.000548e-04    | 2.092055e-03             |
| TG(52:4)                   | Lipids: Triglycerides                    | 1.316578e-04    | 2.523440e-03             |
| TG(48:2)                   | Lipids: Triglycerides                    | 1.728144e-04    | 2.798978e-03             |
| TG(50:3)                   | Lipids: Triglycerides                    | 1.761190e-04    | 2.798978e-03             |
| Leucine                    | Amines                                   | 1.825420e-04    | 2.798978e-03             |
| TG(56:8)                   | Lipids: Triglycerides                    | 2.126884e-04    | 2.886597e-03             |
| TG(51:3)                   | Lipids: Triglycerides                    | 2.317948e-04    | 2.886597e-03             |
| TG(50:1)                   | Lipids: Triglycerides                    | 2.324632e-04    | 2.886597e-03             |
| TG(48:3)                   | Lipids: Triglycerides                    | 2.384581e-04    | 2.886597e-03             |
| TG(52:5)                   | Lipids: Triglycerides                    | 2.827883e-04    | 3.182738e-03             |
| TG(50:2)                   | Lipids: Triglycerides                    | 2.905978e-04    | 3.182738e-03             |
| TG(46:2)                   | Lipids: Triglycerides                    | 3.557556e-04    | 3.610453e-03             |
| TG(48:1)                   | Lipids: Triglycerides                    | 3.610453e-04    | 3.610453e-03             |
| TG(50:0)                   | Lipids: Triglycerides                    | 4.318757e-04    | 4.138809e-03             |
| TG(52:3)                   | Lipids: Triglycerides                    | 5.484129e-04    | 5.045398e-03             |
| TG(56:7)                   | Lipids: Triglycerides                    | 8.909861e-04    | 7.881800e-03             |
| Isoleucine                 | Amines                                   | 9.404737e-04    | 8.011442e-03             |
| PGD2                       | Oxidative stress: Prostaglandins         | 9.789025e-04    | 8.040984e-03             |
| LPC(18:1)                  | lipids: Lysophosphatidylcholine          | 1.210008e-03    | 9.506953e-03             |
| TG(52:1)                   | Lipids: Triglycerides                    | 1.240037e-03    | 9.506953e-03             |
| SM(d18:1/20:1)             | Lipids: Sphingomyelins                   | 1.592411e-03    | 1.176462e-02             |
| 1-Methylhistidine          | Amines                                   | 1.636817e-03    | 1.176462e-02             |
| 5- <i>i</i> PF2a VI        | Oxidative stress: Isoprostane            | 2.014948e-03    | 1.404357e-02             |
| 2-hydroxybutyric acid      | Organic acids                            | 2.242011e-03    | 1.506750e-02             |
| TG(54:5)                   | Lipids: Triglycerides                    | 2.292880e-03    | 1.506750e-02             |
| SM(d18:1/23:0)             | Lipids: Sphingomyelins                   | 2.583397e-03    | 1.607458e-02             |
| TG(51:1)                   | Lipids: Triglycerides                    | 2.639813e-03    | 1.607458e-02             |
| TG(58:10)                  | Lipids: Triglycerides                    | 2.655801e-03    | 1.607458e-02             |
| TG(51:2)                   | Lipids: Triglycerides                    | 2.892979e-03    | 1.706116e-02             |
| TG(46:1)                   | Lipids: Triglycerides                    | 3.683727e-03    | 2.118143e-02             |
| LPA C14:0                  | Oxidative stress: Lyso-phosphatidic acid | 4.021010e-03    | 2.255689e-02             |
| 3-Hydroxyisovaleric acid   | Organic acids                            | 4.778686e-03    | 2.616899e-02             |
| TG(58:9)                   | Lipids: Triglycerides                    | 5.031803e-03    | 2.691430e-02             |
| Histidine                  | Amines                                   | 6.498831e-03    | 3.397116e-02             |
| DG(36:3)                   | Lipids: Diacylglycerol                   | 7.216737e-03    | 3.688554e-02             |
| Phenylalanine              | Amines                                   | 7.730540e-03    | 3.812873e-02             |
| TG(52:2)                   | Lipids: Triglycerides                    | 7.791523e-03    | 3.812873e-02             |
| SM(d18:1/24:2)             | Lipids: Sphingomyelins                   | 8.365093e-03    | 4.008274e-02             |
| PC(O-44:5)                 | Lipids: Plasmalogen Phosphatidylcholine  | 8.717054e-03    | 4.091679e-02             |
| 8,12- <i>i</i> PF2a IV     | Oxidative stress: Isoprostane            | 9.768359e-03    | 4.493445e-02             |
| TG(46:0)                   | Lipids: Triglycerides                    | 1.042619e-02    | 4.702009e-02             |
| Methionine                 | Amines                                   | 1.133966e-02    | 4.952164e-02             |
| LPA C20:1                  | Oxidative stress: Lyso-phosphatidic acid | 1.141151e-02    | 4.952164e-02             |

## 2. CLASSIFICATION SIGNATURE

The approach for the construction of classification signatures was described in in *Section 2.2.1 of Supplementary Text 2*. Model performances can be found in Figure S3.1. The prediction model carrying the clinical variables only resulted in an AUC of .695. The model that used the Lasso for selection amongst the metabolites sorts a somewhat better classification performance, yielding an AUC of .746. The model that adds a (Lasso-based) selection of metabolites to the clinical variables then improves predictive performance along the full false positive rate range, sorting a AUC of .796. Table S3.3 contains the metabolites selected in the selection-amongst-metabolites-only situation. Table S3.4 then contains the metabolites selected in the selection-amongst-metabolites-whilst-clinical-variables-present situation. We see, for the compounds that also occur in the differential expression signature, that

TABLE S3.2. Differentially expressed metabolites when correcting for all clinical variables.

| Metabolite                 | Compound class                           | <i>p</i> -value | Adjusted <i>p</i> -value |
|----------------------------|------------------------------------------|-----------------|--------------------------|
| Tyrosine                   | Amines                                   | 1.293884e-05    | 0.001941711              |
| 2-Amino adipic acid        | Amines                                   | 2.118905e-05    | 0.001941711              |
| 8-iso-PGF2a (15-F2t-IsoP)  | Oxidative stress: Isoprostane            | 2.647672e-05    | 0.001941711              |
| Methyl dopa                | Amines                                   | 3.376889e-05    | 0.001941711              |
| TG(54:6)                   | Lipids: Triglycerides                    | 7.936780e-05    | 0.003650919              |
| TG(56:8)                   | Lipids: Triglycerides                    | 1.064855e-04    | 0.003864998              |
| Valine                     | Amines                                   | 1.176304e-04    | 0.003864998              |
| TG(50:4)                   | Lipids: Triglycerides                    | 1.415809e-04    | 0.004070451              |
| S-3-Hydroxyisobutyric acid | Organic acids                            | 2.261572e-04    | 0.005413816              |
| TG(52:4)                   | Lipids: Triglycerides                    | 2.353833e-04    | 0.005413816              |
| TG(51:3)                   | Lipids: Triglycerides                    | 2.779465e-04    | 0.005697531              |
| PGD2                       | Oxidative stress: Prostaglandins         | 2.972625e-04    | 0.005697531              |
| Lysine                     | Amines                                   | 3.235788e-04    | 0.005724855              |
| TG(52:5)                   | Lipids: Triglycerides                    | 3.734782e-04    | 0.005825832              |
| TG(56:7)                   | Lipids: Triglycerides                    | 3.799456e-04    | 0.005825832              |
| TG(48:3)                   | Lipids: Triglycerides                    | 4.059878e-04    | 0.005836075              |
| TG(50:3)                   | Lipids: Triglycerides                    | 6.422663e-04    | 0.008689485              |
| TG(46:2)                   | Lipids: Triglycerides                    | 8.831594e-04    | 0.011284814              |
| TG(52:3)                   | Lipids: Triglycerides                    | 9.803097e-04    | 0.011866907              |
| TG(58:10)                  | Lipids: Triglycerides                    | 1.166642e-03    | 0.013416381              |
| SM(d18:1/23:0)             | Lipids: Sphingomyelins                   | 1.259544e-03    | 0.013795004              |
| TG(48:2)                   | Lipids: Triglycerides                    | 1.442328e-03    | 0.014514992              |
| TG(58:9)                   | Lipids: Triglycerides                    | 1.451499e-03    | 0.014514992              |
| TG(48:0)                   | Lipids: Triglycerides                    | 1.516374e-03    | 0.014531917              |
| 5-iPF2a VI                 | Oxidative stress: Isoprostane            | 1.584192e-03    | 0.014574562              |
| SM(d18:1/20:1)             | Lipids: Sphingomyelins                   | 1.899763e-03    | 0.016805592              |
| Methylmalonic acid         | Organic acids                            | 2.206887e-03    | 0.018156831              |
| 3-Hydroxyisovaleric acid   | Organic acids                            | 2.210397e-03    | 0.018156831              |
| Ornithine                  | Amines                                   | 3.068127e-03    | 0.024137545              |
| TG(50:2)                   | Lipids: Triglycerides                    | 3.148375e-03    | 0.024137545              |
| Leucine                    | Amines                                   | 3.330067e-03    | 0.024706952              |
| TG(54:5)                   | Lipids: Triglycerides                    | 3.448227e-03    | 0.024784134              |
| DG(36:3)                   | Lipids: Diacylglycerol                   | 3.614235e-03    | 0.025190125              |
| TG(48:1)                   | Lipids: Triglycerides                    | 3.740068e-03    | 0.025300461              |
| TG(50:0)                   | Lipids: Triglycerides                    | 3.923739e-03    | 0.025784569              |
| Phenylalanine              | Amines                                   | 4.059826e-03    | 0.025937777              |
| TG(50:1)                   | Lipids: Triglycerides                    | 4.237719e-03    | 0.026342577              |
| O-Acetylserine             | Amines                                   | 4.959665e-03    | 0.030019024              |
| 8,12-iPF2a IV              | Oxidative stress: Isoprostane            | 5.360289e-03    | 0.031324259              |
| TG(51:2)                   | Lipids: Triglycerides                    | 5.447697e-03    | 0.031324259              |
| SM(d18:1/25:0)             | Lipids: Sphingomyelins                   | 7.146770e-03    | 0.039619151              |
| NO2-aLA (C18:3)            | Oxidative stress: Nitro-Fatty acid       | 7.234801e-03    | 0.039619151              |
| LPA C18                    | Oxidative stress: Lyso-phosphatidic acid | 7.416156e-03    | 0.039667810              |
| LPA C14:0                  | Oxidative stress: Lyso-phosphatidic acid | 8.866032e-03    | 0.046345167              |

the signs of their effects concur with the pattern of AD-associated under- and overexpression.

### 3. SOME REFLECTIONS

Of the 285 subjects included in the analyzes above a total of 37 had a CSF-biomarker status discordant with their clinical diagnosis. That is, these subjects were either clinically diagnosed with AD while their CSF-markers were normal ( $t\text{-tau}/A\beta_{42} \leq 0.52$ ) or clinically diagnosed as normal while their CSF-markers indicated AD ( $t\text{-tau}/A\beta_{42} > 0.52$ ). The disease status of these subjects is thus unsure as it is unclear which diagnosis (clinical or biomarker-based) should take precedence. Hence, the main analyzes revolved around those cases in which the clinical and biomarker-based diagnoses were concordant. Below we reflect on the findings above in relation to the main analyzes.

The larger sample size implies that we have more power in finding differentially expressed metabolites. Hence, Tables S3.1 and S3.2 list more metabolites than their corresponding tables in *Supplementary Text 2* (S2.3 and S2.2) and the Main text (Table 3). As the increase in power comes from subjects whose disease status is

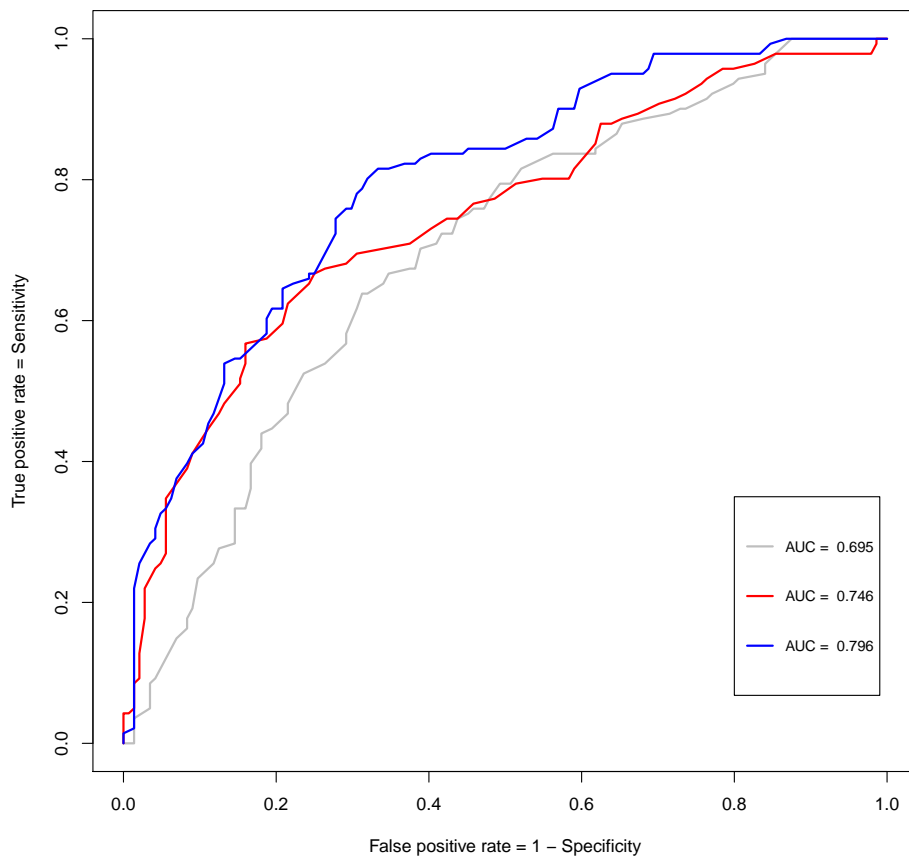

FIGURE S3.1. ROC curves for the classification models. The grey line represents the ROC curve for the unpenalized logistic regression model that entertains the clinical characteristics only. The red line represents the ROC curve for the logistic model in which the Lasso performed variable selection amongst the metabolites (and that does not consider the clinical characteristics). The blue line represents the ROC curve of the logistic model in which the clinical characteristics are present while the Lasso may select amongst the metabolites.

somewhat unsure, the results in Tables S3.1 and S3.2 are somewhat tentative. These results are, however, concordant with the results from the main analyzes, in the sense that they overlap, i.e.: The metabolites listed in Table S2.3 of *Supplementary Text 2* (see also column 3 of Table 3 of the Main text) are a proper subset (except for Proline, PC(O-34:1), LPC(20:4), SM(18:1/16:0), and Ornithine) of the metabolites listed in Table S3.1; and the metabolites listed in Table S2.2 of *Supplementary Text 2* (see also column 4 of Table 3 of the Main text) are a proper subset of the metabolites listed in Table S3.2.

TABLE S3.3. Selected metabolites and parameter estimates when considering only metabolites as potential predictors.

| Metabolite                | Compound class                                  | $\beta$       |
|---------------------------|-------------------------------------------------|---------------|
| LPC(18:1)                 | lipids: Lysophosphatidylcholine                 | 0.3775846437  |
| Methyl dopa               | Amines                                          | -0.3280999265 |
| PGD2                      | Oxidative stress: Prostaglandins                | -0.3136491690 |
| NO2-aLA (C18:3)           | Oxidative stress: Nitro-Fatty acid              | -0.2042163853 |
| O-Acetylserine            | Amines                                          | -0.1811852503 |
| SM(d18:1/23:0)            | Lipids: Sphingomyelins                          | -0.1711821392 |
| Tyrosine                  | Amines                                          | -0.1588698635 |
| SM(d18:1/20:1)            | Lipids: Sphingomyelins                          | 0.1375561855  |
| 5-iPF2a VI                | Oxidative stress: Isoprostane                   | -0.1296136239 |
| Glyceric acid             | Organic acids                                   | -0.1271578713 |
| PC(O-34:3)                | Lipids: Plasmalogen Phosphatidylcholine         | -0.1154877989 |
| TG(54:6)                  | Lipids: Triglycerides                           | -0.1099736486 |
| 8,12-iPF2a IV             | Oxidative stress: Isoprostane                   | -0.1091228644 |
| Methylmalonic acid        | Organic acids                                   | -0.1021936840 |
| TG(48:2)                  | Lipids: Triglycerides                           | -0.0880997011 |
| 8-iso-PGF2a (15-F2t-IsoP) | Oxidative stress: Isoprostane                   | -0.0859696149 |
| LPA C16                   | Oxidative stress: Lyso-phosphatidic acid        | -0.0712895571 |
| 2,3-dinor-8-iso-PGF2a     | Oxidative stress: Isoprostane                   | -0.0660850151 |
| TG(O-50:0)                | Lipids: Triglycerides                           | 0.0631492242  |
| TG(48:0)                  | Lipids: Triglycerides                           | -0.0594940757 |
| PC(O-38:6)                | Lipids: Plasmalogen Phosphatidylcholine         | -0.0573684699 |
| LPA C14:0                 | Oxidative stress: Lyso-phosphatidic acid        | -0.0462058983 |
| Serine                    | Amines                                          | 0.0427658066  |
| Putrescine                | Amines                                          | -0.0402777537 |
| LPA C22:4                 | Oxidative stress: Lyso-phosphatidic acid        | 0.0336067651  |
| Lysine                    | Amines                                          | -0.0308966941 |
| 3-Methoxytyramine         | Amines                                          | -0.0171013575 |
| cLPA C18:1                | Oxidative stress: Cyclic-lyso-phosphatidic acid | -0.0127374834 |
| PE(O-38:5)                | Lipids: Plasmalogen Phosphatidylethanolamine    | -0.0079640017 |
| 2-Aminoadipic acid        | Amines                                          | -0.0069680882 |
| Carnosine                 | Amines                                          | 0.0022778247  |
| LPC(20:4)                 | Lipids: Lysophosphatidylcholine                 | 0.0006342159  |

TABLE S3.4. Selected metabolites and parameter estimates when considering metabolites as potential predictors on top of the clinical variables.

| Metabolite                | Compound class                           | $\beta$     |
|---------------------------|------------------------------------------|-------------|
| PGD2                      | Oxidative stress: Prostaglandins         | -0.48204926 |
| SM(d18:1/20:1)            | Lipids: Sphingomyelins                   | 0.33329421  |
| O-Acetylserine            | Amines                                   | -0.28384663 |
| Methyl dopa               | Amines                                   | -0.27782490 |
| 8-iso-PGF2a (15-F2t-IsoP) | Oxidative stress: Isoprostane            | -0.25085235 |
| NO2-aLA (C18:3)           | Oxidative stress: Nitro-Fatty acid       | -0.24269712 |
| Methylmalonic acid        | Organic acids                            | -0.22969766 |
| Tyrosine                  | Amines                                   | -0.17320260 |
| TG(52:4)                  | Lipids: Triglycerides                    | -0.15033254 |
| Gamma-glutamylalanine     | Amines                                   | 0.13963417  |
| Putrescine                | Amines                                   | -0.13769196 |
| 8,12-iPF2a IV             | Oxidative stress: Isoprostane            | -0.13656275 |
| TG(51:3)                  | Lipids: Triglycerides                    | -0.13258986 |
| SM(d18:1/23:0)            | Lipids: Sphingomyelins                   | -0.11398902 |
| Citrulline                | Amines                                   | -0.10005829 |
| Glyceric acid             | Organic acids                            | -0.09690281 |
| LPC(18:1)                 | lipids: Lysophosphatidylcholine          | 0.09252004  |
| PC(O-34:3)                | Lipids: Plasmalogen Phosphatidylcholine  | -0.09149649 |
| 3-Hydroxyisovaleric acid  | Organic acids                            | -0.08574230 |
| 5-iPF2a VI                | Oxidative stress: Isoprostane            | -0.08026972 |
| LPA C14:0                 | Oxidative stress: Lyso-phosphatidic acid | -0.07726029 |
| 2,3-dinor-8-iso-PGF2a     | Oxidative stress: Isoprostane            | -0.07467916 |
| TG(58:10)                 | Lipids: Triglycerides                    | -0.06409276 |
| Cysteine                  | Amines                                   | 0.04297397  |
| Carnosine                 | Amines                                   | 0.03408938  |
| PC(O-34:2)                | Lipids: Plasmalogen Phosphatidylcholine  | -0.03066565 |
| SM(d18:1/25:0)            | Lipids: Sphingomyelins                   | -0.01019553 |

The main model of interest – selecting metabolites on top of clinical predictors – has a concordant performance on the full and CSF-confirmed data: in both instances the model sorts an AUC of approximately .79. Moreover, most of the

(top) compounds in Table *S2.5* of *Supplementary Text 2* appear as selected (top) compounds in Table S3.4. The insecurity regarding the status of subjects with discordant diagnoses is, however, reflected somewhat in the classification signatures. For example, if we would take, for the main model of interest, the logistic cut-off at the optimal cut-off in terms of accuracy (.42, as determined by 10-fold CV), then we see that those clinically diagnosed with AD while having a normal CSF-status (14) tend to be predominantly classified as AD cases while those clinically diagnosed as normal while having an AD CSF-status (23) seem to be randomly classified as either AD or control cases.

Insecurity regarding the true status of those with a discordant CSF-biomarker status implies that the class-specific (AD or SCD) samples are heterogeneous. Heterogeneity can lead to the dilution of partial correlations and, hence, may hamper network extraction [S3.1]. Results on the regulatory signature are, for reasons of brevity, not included.

#### REFERENCES

- [S3.1] van Wieringen, W.N., & van der Vaart, A.W. (2015). Transcriptomic heterogeneity in cancer as a consequence of dysregulation of the gene-gene interaction network. *Bulletin of Mathematical Biology*, 77: 1768–1786.



(Francisca A. de Leeuw) ALZHEIMER CENTER AND DEPT. OF NEUROLOGY, AMSTERDAM NEUROSCIENCE, VU UNIVERSITY MEDICAL CENTER AMSTERDAM, AMSTERDAM, THE NETHERLANDS; AND DEPT. OF CLINICAL CHEMISTRY, VU UNIVERSITY MEDICAL CENTER AMSTERDAM, AMSTERDAM, THE NETHERLANDS

*E-mail address:* [f.deleeuw@vumc.nl](mailto:f.deleeuw@vumc.nl)

(Carel F.W. Peeters) DEPT. OF EPIDEMIOLOGY & BIostatISTICS, AMSTERDAM PUBLIC HEALTH RESEARCH INSTITUTE, VU UNIVERSITY MEDICAL CENTER AMSTERDAM, AMSTERDAM, THE NETHERLANDS

*E-mail address:* [cf.peeters@vumc.nl](mailto:cf.peeters@vumc.nl)

(Maartje I. Kester) ALZHEIMER CENTER AND DEPT. OF NEUROLOGY, AMSTERDAM NEUROSCIENCE, VU UNIVERSITY MEDICAL CENTER AMSTERDAM, AMSTERDAM, THE NETHERLANDS

*E-mail address:* [m.kester@vumc.nl](mailto:m.kester@vumc.nl)

(Amy C. Harms) DIVISION OF ANALYTICAL BIOSCIENCES, LEIDEN ACADEMIC CENTRE FOR DRUG RESEARCH, LEIDEN UNIVERSITY, LEIDEN, THE NETHERLANDS

*E-mail address:* [a.c.harms@lacdr.leidenuniv.nl](mailto:a.c.harms@lacdr.leidenuniv.nl)

(Eduard A. Struys) DEPT. OF CLINICAL CHEMISTRY, VU UNIVERSITY MEDICAL CENTER AMSTERDAM, AMSTERDAM, THE NETHERLANDS

*E-mail address:* [E.Struys@vumc.nl](mailto:E.Struys@vumc.nl)

(Thomas Hankemeier) DIVISION OF ANALYTICAL BIOSCIENCES, LEIDEN ACADEMIC CENTRE FOR DRUG RESEARCH, LEIDEN UNIVERSITY, LEIDEN, THE NETHERLANDS

*E-mail address:* [hankemeier@lacdr.leidenuniv.nl](mailto:hankemeier@lacdr.leidenuniv.nl)

(Herman W.T. van Vlijmen) DISCOVERY SCIENCES, JANSSEN RESEARCH AND DEVELOPMENT, BEERSE, BELGIUM; AND DIVISION OF MEDICINAL CHEMISTRY, LEIDEN ACADEMIC CENTRE FOR DRUG RESEARCH, LEIDEN UNIVERSITY, LEIDEN, THE NETHERLANDS

*E-mail address:* [hvvlijme@its.jnj.com](mailto:hvvlijme@its.jnj.com)

(Sven J. van der Lee) GENETIC EPIDEMIOLOGY UNIT, DEPT. OF EPIDEMIOLOGY, ERASMUS MC, ROTTERDAM, THE NETHERLANDS; AND ALZHEIMER CENTER, VU UNIVERSITY MEDICAL CENTER AMSTERDAM, AMSTERDAM, THE NETHERLANDS

*E-mail address:* [s.j.vanderlee@vumc.nl](mailto:s.j.vanderlee@vumc.nl)

(Cornelia M. van Duijn) GENETIC EPIDEMIOLOGY UNIT, DEPT. OF EPIDEMIOLOGY, ERASMUS MC, ROTTERDAM, THE NETHERLANDS

*E-mail address:* [c.vanduijn@erasmusmc.nl](mailto:c.vanduijn@erasmusmc.nl)

(Philip Scheltens) ALZHEIMER CENTER AND DEPT. OF NEUROLOGY, AMSTERDAM NEUROSCIENCE, VU UNIVERSITY MEDICAL CENTER AMSTERDAM, AMSTERDAM, THE NETHERLANDS

*E-mail address:* [p.scheltens@vumc.nl](mailto:p.scheltens@vumc.nl)

(Ayşe Demirkan) GENETIC EPIDEMIOLOGY UNIT, DEPT. OF EPIDEMIOLOGY, ERASMUS MC, ROTTERDAM, THE NETHERLANDS; AND DEPT. OF HUMAN GENETICS, LEIDEN UNIVERSITY MEDICAL CENTER, LEIDEN, THE NETHERLANDS

*E-mail address:* [a.demirkan@erasmusmc.nl](mailto:a.demirkan@erasmusmc.nl)

(Mark A. van de Wiel) DEPT. OF EPIDEMIOLOGY & BIostatISTICS, AMSTERDAM PUBLIC HEALTH RESEARCH INSTITUTE, VU UNIVERSITY MEDICAL CENTER AMSTERDAM, AMSTERDAM, THE NETHERLANDS; AND DEPT. OF MATHEMATICS, VU UNIVERSITY AMSTERDAM, AMSTERDAM, THE NETHERLANDS

*E-mail address:* [mark.vdwiel@vumc.nl](mailto:mark.vdwiel@vumc.nl)

(Wiesje M. van der Flier) ALZHEIMER CENTER AND DEPT. OF NEUROLOGY, AMSTERDAM NEUROSCIENCE, VU UNIVERSITY MEDICAL CENTER AMSTERDAM, AMSTERDAM, THE NETHERLANDS; AND DEPT. OF EPIDEMIOLOGY & BIostatISTICS, AMSTERDAM PUBLIC HEALTH RESEARCH INSTITUTE, VU UNIVERSITY MEDICAL CENTER AMSTERDAM, AMSTERDAM, THE NETHERLANDS

*E-mail address:* [WM.vdFlier@vumc.nl](mailto:WM.vdFlier@vumc.nl)

(Charlotte E. Teunissen) NEUROCHEMISTRY LABORATORY AND BIOBANK, DEPT. OF CLINICAL CHEMISTRY, AMSTERDAM NEUROSCIENCE, VU UNIVERSITY MEDICAL CENTER AMSTERDAM, AMSTERDAM, THE NETHERLANDS

*E-mail address:* [c.teunissen@vumc.nl](mailto:c.teunissen@vumc.nl)
